# Supplementary material
Source: PubMed Central journal article supplement (PMC3982220)
Supplement: NIHMS538864-supplement-Appendix_A.pdf [file NIHMS538864-supplement-Appendix_A.pdf]

## Appendix A. Studies contributing to the pooled analysis

| Study name                          | Country<br>(substudy)    | Cases        | Controls      | Diagnosis      |               | Among<br>controls                     |
|-------------------------------------|--------------------------|--------------|---------------|----------------|---------------|---------------------------------------|
|                                     |                          |              |               | Median<br>year | Median<br>age | Median age at<br>first<br>intercourse |
| <b>COHORT</b>                       |                          |              |               |                |               |                                       |
| Guanacaste <sup>1</sup>             | Costa Rica               | 14           | 397           | 1993           | 48            | 18                                    |
| <b>POPULATION CASE-CONTROL</b>      |                          |              |               |                |               |                                       |
| Los Angeles squamous <sup>2</sup>   | USA                      | 67           | 101           | 1981           | 51            | 20                                    |
| Brinton US <sup>3</sup>             | USA                      | 107          | 288           | 1983           | 52            | 20                                    |
| Male Factor <sup>4</sup>            | Denmark                  | 4            | 68            | 1985           | 39            | 18                                    |
| UK case-control <sup>5</sup>        | UK                       | 113          | 415           | 1986           | 37            | 19                                    |
| Los Angeles adeno <sup>6</sup>      | USA                      | 13           | 96            | 1985           | 36            | 20                                    |
| IARC <sup>7</sup>                   | Colombia                 | 92           | 103           | 1987           | 45            | 19                                    |
|                                     | Spain                    | 153          | 195           | 1987           | 53            | 23                                    |
| North Thames invasive <sup>8</sup>  | UK                       | 8            | 69            | 1988           | 36            | 19                                    |
| Daling Seattle <sup>9,10</sup>      | USA                      | 79           | 418           | 1990           | 53            | 21                                    |
| US adeno <sup>11</sup>              | USA                      | 33           | 96            | 1992           | 45            | 19                                    |
| Latvia <sup>12</sup>                | Latvia                   | 41           | 72            | 1999           | 65            | 21                                    |
| <b>HOSPITAL CASE-CONTROL</b>        |                          |              |               |                |               |                                       |
| WHO <sup>13</sup>                   | Australia                | 21           | 376           | 1980           | 45            | 20                                    |
|                                     | Nigeria                  | 15           | 103           | 1980           | 39            | 19                                    |
|                                     | Philippines              | 127          | 665           | 1981           | 42            | 20                                    |
|                                     | Kenya                    | 8            | 113           | 1982           | 42            | 17                                    |
|                                     | Chile                    | 65           | 669           | 1982           | 45            | 19                                    |
|                                     | Israel                   | 45           | 1140          | 1982           | 41            | 19                                    |
|                                     | Colombia                 | 15           | 136           | 1982           | 50            | 18                                    |
|                                     | Mexico                   | 175          | 1158          | 1984           | 42            | 18                                    |
|                                     | Thailand (Siriraj)       | 643          | 2231          | 1984           | 44            | 20                                    |
|                                     | Thailand (Chulalongkorn) | 375          | 1771          | 1984           | 45            | 21                                    |
|                                     | Thailand (Chiang Mai)    | 545          | 1971          | 1985           | 46            | 19                                    |
| Milan <sup>14,15</sup>              | Italy                    | 553          | 658           | 1985           | 54            | 22                                    |
| Bangkok <sup>16,17</sup>            | Thailand                 | 261          | 664           | 1992           | 43            | 21                                    |
| Brinton Latin America <sup>18</sup> | Colombia                 | 81           | 211           | 1986           | 50            | 19                                    |
|                                     | Costa Rica               | 71           | 206           | 1986           | 47            | 19                                    |
|                                     | Mexico                   | 89           | 195           | 1986           | 47            | 19                                    |
|                                     | Panama                   | 57           | 123           | 1986           | 51            | 18                                    |
| IARC <sup>19-28</sup>               | Paraguay                 | 39           | 71            | 1989           | 48            | 19                                    |
|                                     | Brazil                   | 110          | 138           | 1991           | 55            | 21                                    |
|                                     | Thailand                 | 234          | 269           | 1991           | 51            | 20                                    |
|                                     | Mali                     | 31           | 47            | 1992           | 45            | 15                                    |
|                                     | Philippines              | 271          | 314           | 1992           | 48            | 21                                    |
|                                     | Morocco                  | 132          | 160           | 1993           | 50            | 18                                    |
|                                     | Peru                     | 57           | 80            | 1996           | 53            | 20                                    |
|                                     | Algeria                  | 136          | 141           | 1998           | 52            | 19                                    |
|                                     | India                    | 194          | 209           | 1998           | 47            | 18                                    |
| <b>TOTAL</b>                        |                          | <b>5,074</b> | <b>16,137</b> |                |               |                                       |

## REFERENCES

- (1) Hildesheim A, Herrero R, Castle PE, Wacholder S, Bratti MC, Sherman ME, Lorincz AT, Burk RD, Morales J, Rodriguez AC, Helgesen K, Alfaro M, et al. HPV co-factors related to the development of cervical cancer: results from a population-based study in Costa Rica. *Br J Cancer* 2001;**84**:1219-26.
- (2) Peters RK, Thomas D, Hagan DG, Mack TM, Henderson BE. Risk factors for invasive cervical cancer among Latinas and non-Latinas in Los Angeles County. *J Natl Cancer Inst* 1986;**77**:1063-77.
- (3) Brinton LA, Hamman RF, Huggins GR, Lehman HF, Levine RS, Mallin K, Fraumeni JF, Jr. Sexual and reproductive risk factors for invasive squamous cell cervical cancer. *J Natl Cancer Inst* 1987;**79**:23-30.
- (4) Kjaer SK, Dahl C, Engholm G, Bock JE, Lynge E, Jensen OM. Case-control study of risk factors for cervical neoplasia in Denmark. II. Role of sexual activity, reproductive factors, and venereal infections. *Cancer Causes Control* 1992;**3**:339-48.
- (5) Green J, Berrington de Gonzalez A, Sweetland S, Beral V, Chilvers C, Crossley B, Deacon J, Hermon C, Jha P, Mant D, Peto J, Pike M, et al. Risk factors for adenocarcinoma and squamous cell carcinoma of the cervix in women aged 20-44 years: the UK National Case-Control Study of Cervical Cancer. *Br J Cancer* 2003;**89**:2078-86.
- (6) Ursin G, Pike MC, Preston-Martin S, d'Ablaing G, III, Peters RK. Sexual, reproductive, and other risk factors for adenocarcinoma of the cervix: results from a population-based case-control study (California, United States). *Cancer Causes Control* 1996;**7**:391-401.
- (7) Bosch FX, Muñoz N, de Sanjose S, Izarzugaza I, Gili M, Viladiu P, Tormo MJ, Moreo P, Ascunce N, Gonzalez LC, Tafur L, Kaldor JM, et al. Risk factors for cervical cancer in Colombia and Spain. *Int J Cancer* 1992;**52**:750-8.
- (8) Cuzick J, Sasieni P, Singer A. Risk factors for invasive cervix cancer in young women. *Eur J Cancer* 1996;**32A**:836-41.
- (9) Daling JR, Madeleine MM, McKnight B, Carter JJ, Wipf GC, Ashley R, Schwartz SM, Beckmann AM, Hagensee ME, Mandelson MT, Galloway DA. The relationship of human papillomavirus-

related cervical tumors to cigarette smoking, oral contraceptive use, and prior herpes simplex virus type 2 infection. *Cancer Epidemiol Biomarkers Prev* 1996;**5**:541-8.

- (10) Madeleine MM, Daling JR, Schwartz SM, Shera K, McKnight B, Carter JJ, Wipf GC, Critchlow CW, McDougall JK, Porter P, Galloway DA. Human papillomavirus and long-term oral contraceptive use increase the risk of adenocarcinoma in situ of the cervix. *Cancer Epidemiol Biomarkers Prev* 2001;**10**:171-7.
- (11) Lacey JV, Jr., Brinton LA, Abbas FM, Barnes WA, Gravitt PE, Greenberg MD, Greene SM, Hadjimichael OC, McGowan L, Mortel R, Schwartz PE, Silverberg SG, et al. Oral contraceptives as risk factors for cervical adenocarcinomas and squamous cell carcinomas. *Cancer Epidemiol Biomarkers Prev* 1999;**8**:1079-85.
- (12) Silins I, Wang X, Tadesse A, Jansen KU, Schiller JT, Avall-Lundqvist E, Frankendal B, Dillner J. A population-based study of cervical carcinoma and HPV infection in Latvia. *Gynecol Oncol* 2004;**93**:484-92.
- (13) WHO. Invasive squamous-cell cervical carcinoma and combined oral contraceptives: results from a multinational study. WHO Collaborative Study of Neoplasia and Steroid Contraceptives. **Int J Cancer** 1993;**55**:228-36.
- (14) La Vecchia C, Franceschi S, Decarli A, Fasoli M, Gentile A, Parazzini F, Regallo M. Sexual factors, venereal diseases, and the risk of intraepithelial and invasive cervical neoplasia. *Cancer* 1986;**58**:935-41.
- (15) Parazzini F, Chatenoud L, La Vecchia C, Chiaffarino F, Ricci E, Negri E. Time since last use of oral contraceptives and risk of invasive cervical cancer. *Eur J Cancer* 1998;**34**:884-8.
- (16) Thomas DB, Qin Q, Kuypers J, Kiviat N, Ashley RL, Koetsawang A, Ray RM, Koetsawang S. Human papillomaviruses and cervical cancer in Bangkok. II. Risk factors for in situ and invasive squamous cell cervical carcinomas. *Am J Epidemiol* 2001;**153**:732-9.
- (17) Thomas DB, Ray RM, Koetsawang A, Kiviat N, Kuypers J, Qin Q, Ashley RL, Koetsawang S. Human papillomaviruses and cervical cancer in Bangkok. I. Risk factors for invasive cervical carcinomas with human papillomavirus types 16 and 18 DNA. *Am J Epidemiol* 2001;**153**:723-31.

- (18) Herrero R, Brinton LA, Reeves WC, Brenes MM, Tenorio F, de Britton RC, Gaitan E, Garcia M, Rawls WE. Sexual behavior, venereal diseases, hygiene practices, and invasive cervical cancer in a high-risk population. *Cancer* 1990;**65**:380-6.
- (19) Muñoz N, Bosch FX, de Sanjose S, Vergara A, del Moral A, Muñoz MT, Tafur L, Gili M, Izarzugaza I, Viladiu P, Navarro C, Alonso de Ruiz P, et al. Risk factors for cervical intraepithelial neoplasia grade III/carcinoma in situ in Spain and Colombia. *Cancer Epidemiol Biomarkers Prev* 1993;**2**:423-31.
- (20) Rolon PA, Smith JS, Muñoz N, Klug SJ, Herrero R, Bosch X, Llamosas F, Meijer CJ, Walboomers JM. Human papillomavirus infection and invasive cervical cancer in Paraguay. *Int J Cancer* 2000;**85**:486-91.
- (21) Eluf-Neto J, Booth M, Muñoz N, Bosch FX, Meijer CJ, Walboomers JM. Human papillomavirus and invasive cervical cancer in Brazil. *Br J Cancer* 1994;**69**:114-9.
- (22) Chichareon S, Herrero R, Muñoz N, Bosch FX, Jacobs MV, Deacon J, Santamaria M, Chongsuvivatwong V, Meijer CJ, Walboomers JM. Risk factors for cervical cancer in Thailand: a case-control study. *J Natl Cancer Inst* 1998;**90**:50-7.
- (23) Bayo S, Bosch FX, de Sanjose S, Muñoz N, Combita AL, Coursaget P, Diaz M, Dolo A, van den Brule AJ, Meijer CJ. Risk factors of invasive cervical cancer in Mali. *Int J Epidemiol* 2002;**31**:202-9.
- (24) Ngelangel C, Muñoz N, Bosch FX, Limson GM, Festin MR, Deacon J, Jacobs MV, Santamaria M, Meijer CJ, Walboomers JM. Causes of cervical cancer in the Philippines: a case-control study. *J Natl Cancer Inst* 1998;**90**:43-9.
- (25) Chaouki N, Bosch FX, Muñoz N, Meijer CJ, El Gueddari B, El Ghazi A, Deacon J, Castellsague X, Walboomers JM. The viral origin of cervical cancer in Rabat, Morocco. *Int J Cancer* 1998;**75**:546-54.
- (26) Santos C, Muñoz N, Klug S, Almonte M, Guerrero I, Alvarez M, Velarde C, Galdos O, Castillo M, Walboomers J, Meijer C, Caceres E. HPV types and cofactors causing cervical cancer in Peru. *Br J Cancer* 2001;**85**:966-71.

- (27) Hammouda D, Muñoz N, Herrero R, Arslan A, Bouhadeb A, Oublil M, Djedeat B, Fontanière B, Snijders PJ, Meijer C, Franceschi S. Cervical carcinoma in Algiers, Algeria: human papillomavirus and lifestyle risk factors. *Int J Cancer* 2005;**113**:483-9.
- (28) Franceschi S, Rajkumar T, Vaccarella S, Gajalakshmi V, Sharmila A, Snijders PJ, Muñoz N, Meijer CJ, Herrero R. Human papillomavirus and risk factors for cervical cancer in Chennai, India: a case-control study. *Int J Cancer* 2003;**107**:127-33.
