# Supplementary material
Source: PubMed Central journal article supplement (PMC3982220)
Supplement: NIHMS538864-supplement-Appendix_B.pdf [file NIHMS538864-supplement-Appendix_B.pdf]

## 1 **Appendix B. History of the multi-stage model of carcinogenesis**

2

3 The incidence rate of many carcinomas rises rapidly in old age, according to the  
4 mathematical relationship

$$5 \quad \textit{rate} \propto (\textit{age})^K$$

6 where  $K$  usually lies between five and six.<sup>1</sup> Based on a proposal by Nordling<sup>2</sup> that the  
7 malignant transformation of a cell was a result of successive mutations, Armitage and  
8 Doll<sup>3</sup> proposed a mathematical model of carcinogenesis in which a cell must go  
9 through a sequence of changes before becoming malignant. This model reproduces  
10 the above age-incidence profile with exponent  $K$  if a cell must go through  $K+1$  steps  
11 before malignant transformation.

12

13 The multi-stage model was adapted to other cancers that do not show the same age-  
14 incidence profile by substituting another time scale for age. Doll<sup>4</sup> showed that lung  
15 cancer in smokers fits the multi-stage model when duration of smoking is used in  
16 place of age. Pike et al.<sup>5</sup> fitted breast cancer into the multi-stage framework by  
17 introducing a synthetic “breast tissue age” that begins at puberty and whose rate of  
18 change relative to physical age is mediated by other hormonal events such as  
19 pregnancy and menopause.

20

21 Despite these advances, further elaboration of the multi-stage model of  
22 carcinogenesis from epidemiological data was not possible. It became clear that a  
23 wide variety of different mechanistic models predict the same pattern of incidence  
24 rates.<sup>6</sup> It was therefore impossible to draw detailed mechanistic conclusions from the

1 incidence profile of a cancer. Nevertheless, there have been two important  
2 contributions of the multi-stage model to understanding cancer aetiology. Firstly, the  
3 theory that a cell must undergo a certain number of mutations in order to become  
4 malignant has been largely vindicated by advances in molecular biology.<sup>7</sup> Hanahan  
5 and Weinberg<sup>8</sup> presented a modern interpretation of the theory of multistage  
6 carcinogenesis in which cancer is considered a manifestation of six essential  
7 alterations in cell physiology that collectively dictate malignant growth. Secondly, in  
8 cancers with a predominant risk factor, the best predictor of risk is duration of  
9 exposure, rather than age *per se*.<sup>9,10</sup>

10

11 In 2004, on the 50<sup>th</sup> anniversary of its publication, Armitage and Doll's article was  
12 reprinted as a discussion paper.<sup>11</sup>

13

14

15

16

17

18

19

20

21

22

23

24

25

1   **REFERENCES**

- 2       (1) Cook PJ, DOLL R, Fellingham SA. A mathematical model for the age  
3           distribution of cancer in man. *Int J Cancer* 1969;**4**:93-112.
- 4       (2) Nordling CO. A new theory on cancer-inducing mechanism. *Br J Cancer*  
5           1953;**7**:68-72.
- 6       (3) Armitage P, Doll R. The age distribution of cancer and a multi-stage theory of  
7           carcinogenesis. *Br J Cancer* 1954;**8**:1-12.
- 8       (4) Doll R. The age distribution of cancer: implications for models of  
9           carcinogenesis. *J R Statist Soc A* 134, 133-155. 1971.
- 10      (5) Pike MC, Krailo MD, Henderson BE, Casagrande JT, Hoel DG. 'Hormonal' risk  
11          factors, 'breast tissue age' and the age-incidence of breast cancer. *Nature*  
12          1983;**303**:767-70.
- 13      (6) Pike MC. A method of analysis of a certain class of experiments in  
14          carcinogenesis. *Biometrics* 1966;**22**:142-61.
- 15      (7) Weiss RA. Multistage carcinogenesis. *Br J Cancer* 2004;**91**:1981-2.
- 16      (8) Hanahan D, Weinberg RA. The hallmarks of cancer. *Cell* 2000;**100**:57-70.
- 17      (9) Day NE. Time as a determinant of risk in cancer epidemiology: the role of  
18          multi-stage models. *Cancer Surveys* 1983;**2**:577-93.
- 19      (10) Peto R. Epidemiology, multistage models and short-term mutagenicity tests.  
20          In: Hiatt H, Watson J, Winsten J, editors. *Origins of Human Cancer*. Cold Spring  
21          Harbor, NY: Cold Spring Harbor Laboratory; 1977. p. 1403.
- 22      (11) ARMITAGE P, DOLL R. The age distribution of cancer and a multi-stage  
23          theory of carcinogenesis. 1954. *Int J Epidemiol* 2004;**33**:1174-9.

24

25
